# Supplementary material for: Childhood Abuse, Adult Intimate Partner Violence and Mental Health Outcomes: An Exploration of Cumulative Patterns of Abuse in a Subset of Studies Included in a Systematic Review
Source: Springer Nature journal article supplement (doi:10.1007/s10896-025-00953-7), 2025-08-29
Supplement: MOESM1 [file 10896_2025_953_MOESM1_ESM.docx]

**Supplementary Table 1.** **Studies investigating** **the association between child abuse (CA) and intimate partner violence (IPV).**

| **Study** | **Findings** |
| --- | --- |
| Thananowan et al. (2022) | **IPV severity: r= 0.335, p<0.01; β=0.318, p<0.05** (beta value from path analyses conducted to examine the predictive power of the number of sexual partners and CA severity for IPV severity) |
| Wadji et al. (2022) | **CSA: IPV exposed M(SD)=7.67(4.52), Control M(SD)=5.56(1.26), p=0.047**  **CPA: IPV exposed M(SD)=2.84(2.13), Control M(SD)=1.21(1.86), p=0.001**  CEA: IPV exposed M(SD)=11.20(5.13), Control M(SD)=9.40(4.32), p=0.118  **CPA and Sex. IPV (severity): rs=0.27, p=0.03, B=5.68, p=0.001**; no other significant relationship between any domain of CA and current IPV (p≥0.073) |
| McNaughton et al. (2020) | **rtet= 0.19, p<0.05** |
| Tasa-Vinyals et al. (2020) | **OR=4.7, p=0.002** |
| Williams et al. (2020) | **IPV (severity) r=0.27, p<0.01** |
| Riedl et al. (2019) | **CA≥4 types AOR=2.04 (CI=1.21,3.42), p=0.007** |
| Wong et al. (2019) | **AOR(CI)= 5.96 (2.73,12.99), p<0.001** |
| Alangea et al. (2018) | **CSA: OR(CI)=1.91 (1.50,2.42), p<0.001; AOR(CI)=1.46 (1.07,1.99), p=0.019**; **CPA: OR(CI)=1.49 (1.14,1.94), p<0.01**; AOR(CI)=1.28 (0.93,1.76), p=0.121; CEA OR(CI)=1.07 (0.83,1.38), p>0.05; AOR(CI)=0.95 (0.74,1.22), p=0.680 |
| Chatzittofis et al. (2017) | **HD group: CSA or CPA; Exposure to violence as an adult (severity) rs=0.41, p<0.01, Used violence as an adult rs=0.36, p<0.05**  **HD group: Used violence as a child (severity); Exposure to violence as an adult rs=0.46, p<0.01, Used violence as an adult rs=0.33, p<0.05** |
| Miller-Graff et al. (2017) | Sex. IPV rpb=0.11, p>0.05, B=0.09, p>0.05; **Phys. IPV rpb=0.35, p<0.001; B=0.21, p<0.01**; **Psyc. IPV rpb=0.31, p<0.01, B=0.19, p<0.05** (beta values from logistic regression analyses (‘path A’ in path analyses) with CA (ACEs) and gestational age entered as independent variables) |
| Oliveira et al. (2017) | **Psyc. IPV (severity): β(CI)=1.92 (1.14,3.26), p=0.015** (standardised beta representing direct effect of CSA on Psyc. IPV as determined by path analysis mapping multiple risk factors for PTSD following childbirth)  Phys. IPV (severity): no significant direct effect of CSA on Phys. IPV |
| Barrios et al. (2015) | **Lifetime Phys. Or Sex. IPV: CSA or CPA: AOR=2.20 (CI=1.72,2.83), p<0.05**; **CSA+CPA: AOR=3.73 (CI=2.75,5.04), p<0.05; Lifetime Phys. IPV: CSA or CPA: AOR=1.94 (CI=1.45,2.58), p<0.05**; **CSA+CPA: AOR=2.68 (CI = 1.88,3.83), p<0.05; Lifetime Sex. IPV: CSA or CPA: AOR=2.27 (CI=1.30,3.95), p<0.05**; **CSA+CPA: AOR=5.00 (CI=2.71,9.22), p<0.05; Lifetime Phys.+Sex. IPV: CSA or CPA: AOR=3.29 (CI=2.01,5.38), p<0.05**; **CSA+CPA: AOR=7.14 (CI=4.15,12.26), p<0.05**  **Phys.Or Sex. IPV in past year: CSA or CPA: AOR=1.79 (CI=1.31,2.44), p<0.05**;  **CSA+CPA: AOR=3.00 (CI=2.07,4.35), p<0.05; Phys. IPV in past year: CSA or CPA: AOR=1.76 (CI=1.23,2.53), p<0.05**; **CSA+CPA: AOR=2.73 (CI=1.77,4.20), p<0.05; Sex. IPV in past year**: CSA or CPA: AOR=2.05 (CI=0.92,4.55), p>0.05; **CSA+CPA: AOR=4.24 (CI=1.77,10.17), p<0.05; Phys.+Sex. IPV in past year**: CSA or CPA: AOR=1.73 (CI= 0.90,3.32), p>0.05; **CSA+CPA: AOR=3.33 (CI=1.60,6.89), p<0.05** |
| Jackson et al. (2015) | Before pregnancy: **r=0.28, p>0.01; B=0.21, p<0.001**  During pregnancy: **r=0.21, p>0.01; B=-0.01, p>0.05** |
| Ouellet-Morin et al. (2015) | **OR(CI)=2.49 (1.85,3.37), p<0.05**; **AOR(CI)=1.90 (1.38,2.63), p<0.05** |
| Gilchrist et al. (2012) | **OR(CI)=3.38 (1.45,7.85), p<0.05**; **AOR(CI)=2.87 (1.05,7.86), p=0.04** |
| Jeter et al. (2014) | CEA: Psychological IPV r=0.11, p>0.05, β=0.04, p>0.05 (standardised beta value from structural equation modelling testing a model of PTSD symptoms determined by childhood, peer, and intimate partner psychological trauma) |
| Sullivan et al. (2012) | **Phys. IPV (severity) r=0.12, p>0.05**; **Sex. IPV (severity) r=0.20, p<0.01**; **Psyc. IPV (severity) r=0.32, p<0.001** |
| Note: CSA = childhood sexual abuse, CPA = childhood physical abuse, CEA = childhood emotional abuse, Phys. = physical, Sex. = sexual, Psyc. = psychological; Samples comprised of women only are indicated by ‘Perinatal’ or ‘F’ (‘female’) in the Population column and those comprised by men only are indicated by ‘M’; rpb = point biserial correlation; rs = Spearman’s rho; rtet = tetrachoric correlation; B = unstandardized beta value; β = standardized beta value; CI = 95% confidence interval; OR = odds ratio; AOR = adjusted odds ratio; beta values and adjusted odds ratios are derived from multivariate linear/logistic regression unless otherwise stated. Significant differences are highlighted in bold. | |
